# Supplementary material for: GRB10 is a novel oncogene associated with cell proliferation and prognosis in glioma
Source: Springer Nature journal article supplement (doi:10.1186/s12935-022-02636-5), 2022-07-05
Supplement: MOESM1 [file 23240350]

Figure S1

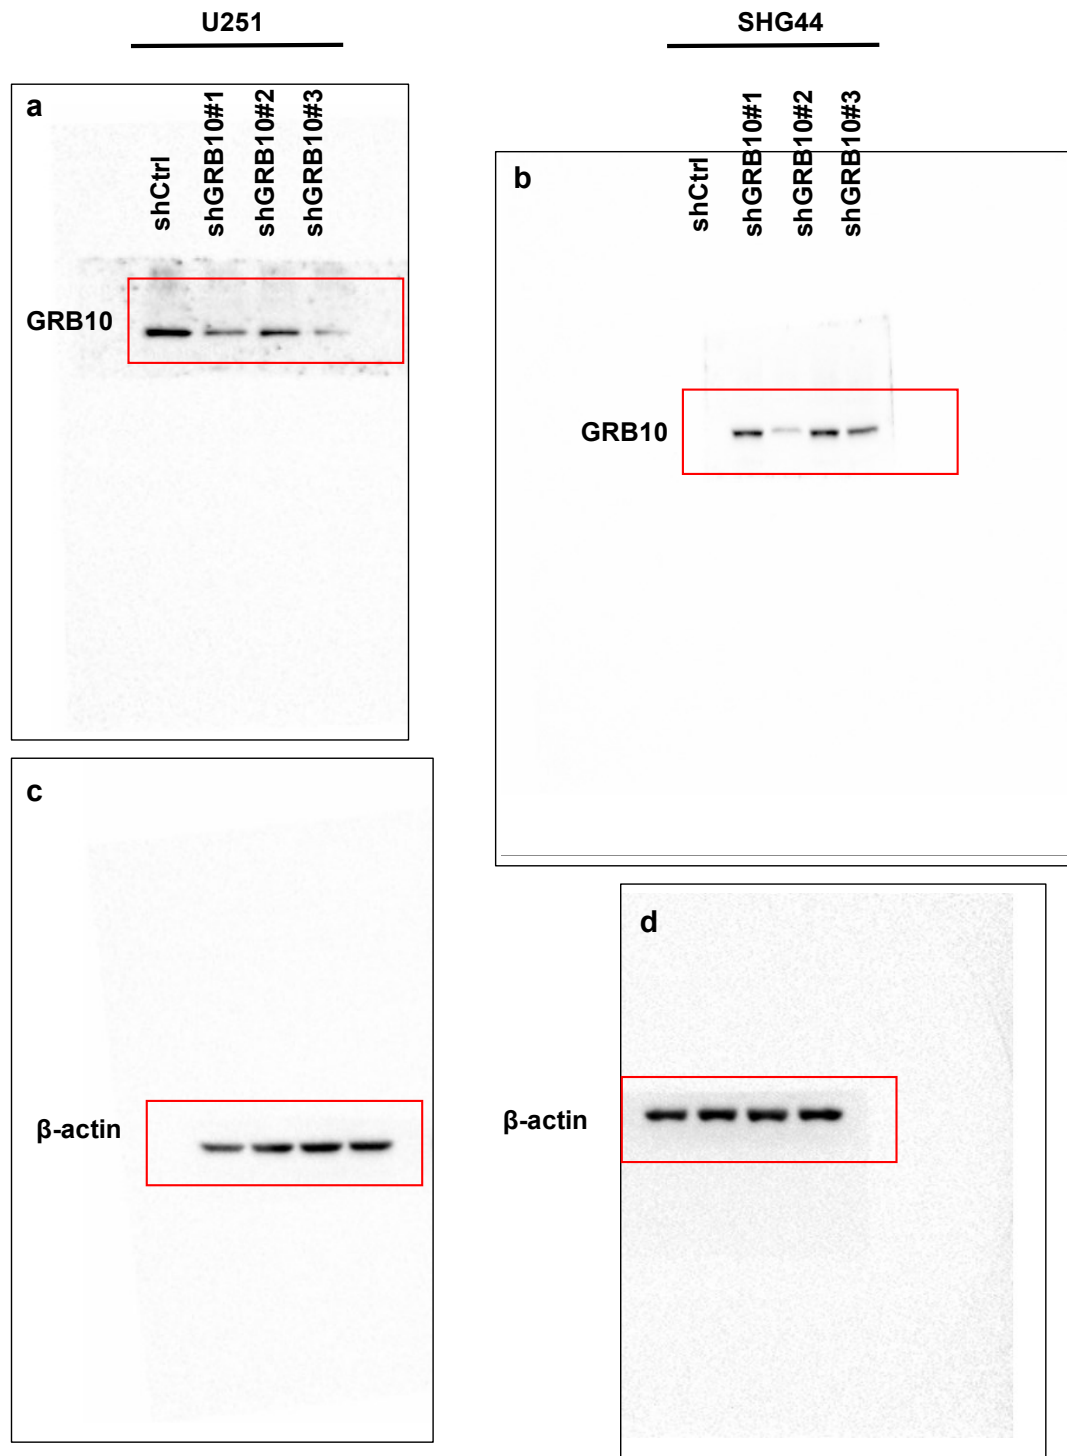

Figure S1 Unprocessed images of blots. Uncropped images of scanned western blots shown in Figure 3 are provided.

Figure S2

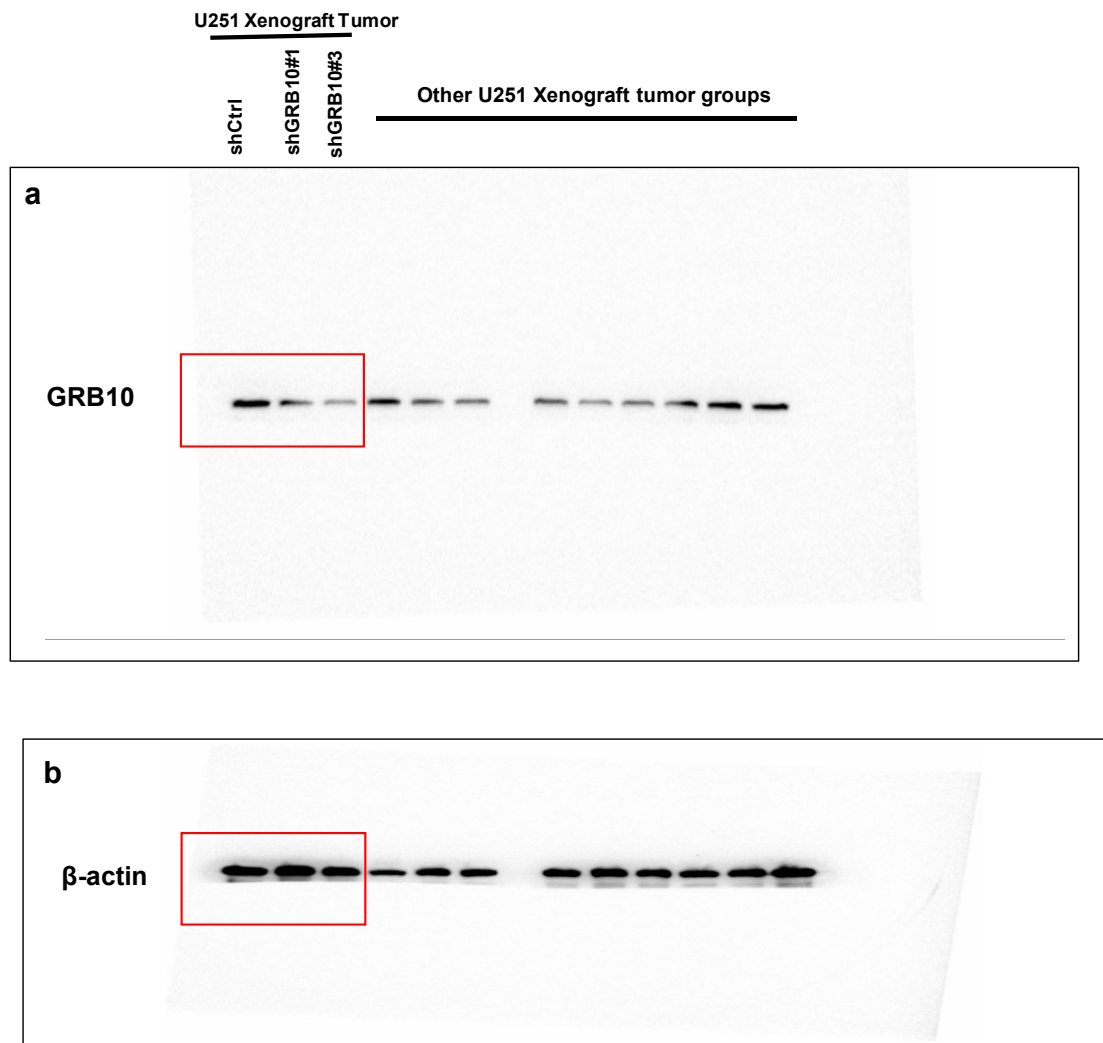

Figure S2 Unprocessed images of blots. Uncropped images of scanned western blots shown in Figure 5 are provided.
